# Supplementary material for: Use of rheumatology-specific patient navigators to understand and reduce barriers to medication adherence: Analysis of qualitative findings
Source: PubMed Central journal article supplement (PMC6053216; doi:10.1371/journal.pone.0200886), 2018-07-19
Supplement: pone.0200886.s002.pdf [file pone.0200886.s002.pdf]

## **S2. Interview Guide for all Navigator-Patient Interactions Other than Baseline and 6-months**

**Record ID:**

**Date:**

**Visit/Call number:**

**Navigator Initials:**

**What is the name of the DMARD you are taking?**

**Have you been taking your DMARD?**

**What has it been like taking your medication for your rheumatic disease?**

**Have you missed any doses of your medication for any reason or had any trouble remembering to take it? If so, when and why did this occur?**

**Have you experienced any side effects or symptoms recently that have been out of the ordinary?**

**Do you have any questions or concerns at this time?"**
